# Supplementary material
Source: PubMed Central journal article supplement (PMC7547868)
Supplement: es0c02022_si_001.pdf [file es0c02022_si_001.pdf]

SUPPORTING INFORMATION

# Direct and indirect effect of increased CO<sub>2</sub> partial pressure on the bioenergetics of syntrophic propionate and butyrate conversion

*Pamela Ceron-Chafla<sup>\*1</sup>, Robbert Kleerebezem<sup>‡</sup>, Korneel Rabaey<sup>◇,\*</sup>, Jules B. van Lier<sup>1</sup> and Ralph E. F Lindeboom<sup>1</sup>*

<sup>1</sup>Sanitary Engineering Section, Department of Water Management, Delft University of Technology, Stevinweg 1, 2628 CN, Delft, The Netherlands.

<sup>‡</sup>Department of Biotechnology, Delft University of Technology, Van der Maasweg 9, Delft, 2629 HZ, Netherlands

<sup>◇</sup>Center for Microbial Ecology and Technology (CMET), Ghent University, Coupure Links 653, B-9000 Ghent, Belgium

<sup>\*</sup>Center for Advanced Process Technology for Urban Resource Recovery (CAPTURE), Coupure Links 653, B-9000 Ghent, Belgium

Number of pages: 11

Number of figures: 4

Number of tables: 5

## Role of inoculum origin on pCO<sub>2</sub> response

The anaerobic conversion of propionate in batch reactors at 1 bar pCO<sub>2</sub> was monitored for nine days for inocula A, B, C and the results are presented in **Figure S1**. Inoculum C showed the fastest propionate conversion. Inoculum B showed an unusually low level of activity and was discarded for additional testing. Propionate conversion by inoculum A seemed to be halted after two days of incubation, which hindered further assessment of conversion rates. The main differences between inoculum A and C, in terms of the physicochemical characteristics, were associated with the initial alkalinity as well as the NH<sub>4</sub><sup>+</sup> concentration (**Table S1**). Bacterial and archaeal communities differed among inoculum A and C, with the latter showing a higher abundance of uncultured microorganisms and hydrogenotrophic methanogens (**Figure S2**). This preliminary data led to the selection of C as the working inoculum for further experiments.

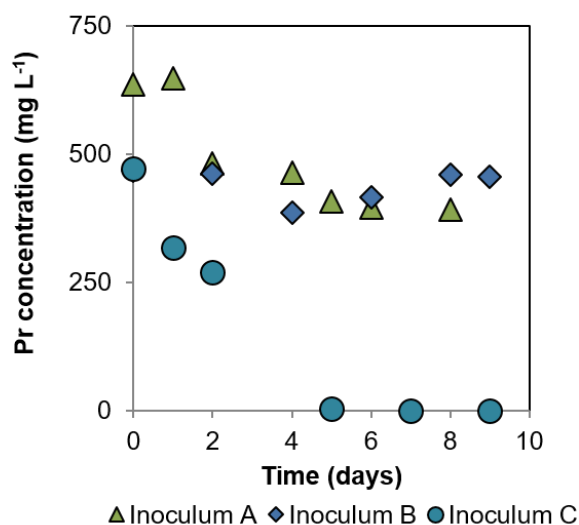

**Figure S1.** Evolution of propionate concentration (mg L<sup>-1</sup>) for the experiments of anaerobic substrate oxidation under moderate pCO<sub>2</sub> (1 bar) using three different inocula (A, B and C). Data points represent experimental data.

**Table S1.** Physicochemical characteristics of the three inocula initially selected for the study of propionate oxidation activity at  $p\text{CO}_2=1$  bar. SD=Standard Deviation.

| Parameter                      | Inoculum A | SD   | Inoculum B | SD   | Inoculum C | SD   | Units               |
|--------------------------------|------------|------|------------|------|------------|------|---------------------|
| COD                            | 34.63      | 0.19 | 38.99      | 2.33 | 22.22      | 0.52 | $\text{g L}^{-1}$   |
| sCOD                           | 0.64       | 0.01 | 5.37       | 0.08 | 1.92       | 0.04 | $\text{g L}^{-1}$   |
| P                              | 0.25       | 0.00 | 1.06       | 0.01 | 0.11       | 0.00 | $\text{mg L}^{-1}$  |
| N-total                        | 1.93       | 0.03 | 2.08       | 0.08 | ND         | ND   | $\text{mg L}^{-1}$  |
| N-NH <sub>4</sub> <sup>+</sup> | 1.08       | 8.66 | 0.93       | 0.01 | 0.11       | 0.00 | $\text{mg L}^{-1}$  |
| Alkalinity                     | 120.10     | 0.01 | 182.22     | 0.52 | 36.29      | 0.50 | $\text{meq L}^{-1}$ |
| VSS                            | 21.47      | 0.02 | 30.42      | 0.15 | 13.62      | 0.01 | $\text{g L}^{-1}$   |
| TSS                            | 28.88      | 0.06 | 57.42      | 0.60 | 15.87      | 0.07 | $\text{g L}^{-1}$   |
| VSS/TSS                        | 74.35      |      | 52.97      |      | 85.80      |      | %                   |
| pH                             | 7.10       |      | 7.25       |      | 7.30       |      | -                   |

## Microbial community analysis

### DNA extraction

Biomass pellets stored at  $-80^{\circ}\text{C}$ , were thawed and DNA was extracted according to the instructions included in the DNeasy Ultra- Clean Microbial kit (Qiagen, Germany). Quality and quantity of the obtained DNA was checked by means of Qubit 3.0 DNA detection (Qubit® dsDNA HS Assay Kit, Life Technologies, U.S).

### Amplicon libraries construction

Library construction and sequencing were performed at the Roy J. Carver Biotechnology Center, University of Illinois at Urbana-Champaign. Their internal procedure summarizes as follows: Approximately 1ng of DNA was used for amplification with the bacterial 16s V3\_F357\_V4-R805 and archaeal 349F-806R primers in the Fluidigm Access Array. The barcoded amplicons generated from each sample were harvested, transferred to a 96 well plate, quantified on a Qubit fluorometer (ThermoFisher, CA) and the average size of the amplicons was determined on a Fragment Analyzer (AATI, IA). All amplicons were pooled in equimolar concentration, size selected on a 2% agarose Ex-gel (Thermofisher) to remove primer dimers and extracted from the isolated gel slice with a Qiagen gel extraction kit (Qiagen). Cleaned size selected product was quantitated and run on a Fragment Analyzer again to confirm appropriate profile and for determination of average size. The pool was diluted to 5nM and further quantitated by qPCR on a CFX Connect Real-Time qPCR system (Biorad, Hercules, CA) for maximization of number of clusters in the flowcell.

## Sequencing on an Illumina MiSeq

The pool was denatured and spiked with 20% non-indexed PhiX V3 control library provided by Illumina and loaded onto the MiSeq V2 flowcell at a concentration of 8 pM for cluster formation and sequencing. The PhiX control library provides a balanced genome for calculation of matrix, phasing and prephasing, which are essential for accurate basecalling. The libraries were sequenced from both ends of the molecules to a total read length of 250nt from each end. The run generated .bcl files which were converted into demultiplexed fastq files using bcl2fastq 2.20 (Illumina, CA).

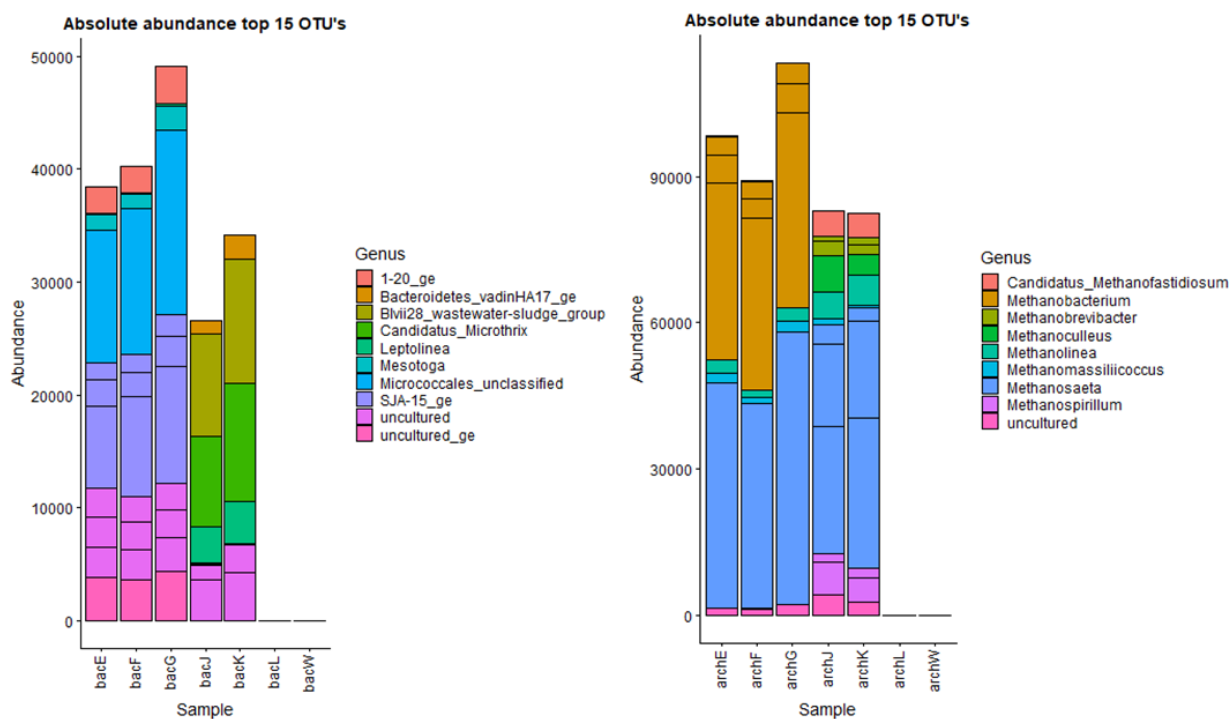

**Figure S2.** Absolute abundance of different genera for bacteria and archaea. Samples E, F and G correspond to starting inoculum C. Samples J and K correspond to starting inoculum A. Samples L and W correspond to negative controls.

**Table S2.** Sampling strategy for the triplicate incubation carried out for the experiments of syntrophic propionate and butyrate conversion under elevated pCO<sub>2</sub>.

| pCO <sub>2</sub><br>(bar) <sup>1</sup> | Propionate     |           |                    |               | Butyrate       |           |                    |               |
|----------------------------------------|----------------|-----------|--------------------|---------------|----------------|-----------|--------------------|---------------|
|                                        | Time<br>(days) | Replicate | Liquid<br>(1.5 mL) | Gas<br>(5 mL) | Time<br>(days) | Replicate | Liquid<br>(1.5 mL) | Gas<br>(5 mL) |
| 0.3, 1,<br>3, 5, 8                     | 0, 10,<br>13   | 1         | x                  | x             | 0, 5,<br>12    | 1         | x                  | x             |
|                                        |                | 2         | x                  | x             |                | 2         | x                  | x             |
|                                        |                | 3         | x                  | x             |                | 3         | x                  | x             |
|                                        | Other          | 1         | x                  |               | Other          | 1         | x                  |               |
|                                        |                | 2         |                    | x             |                | 2         |                    | x             |
|                                        |                | 3         | -                  | -             |                | 3         | -                  | -             |

<sup>1</sup> This value corresponds to initial pressure considering a headspace of >99% CO<sub>2</sub> that will equilibrate with the liquid medium described in the Materials and Methods section.

**Table S3.** Summary of input parameters for the bioenergetics scenario analysis of syntrophic propionate and butyrate conversion. The initial concentrations of propionate, butyrate and acetate were fixed at 10, 7 and 0.1 mM, respectively. Temperature was fixed at mesophilic conditions, 308 K. The employed bicarbonate concentration corresponded to the initial amount of buffer supplied to the system, 100 mM as  $\text{HCO}_3^-$ . The initial partial pressure was selected at 0.001 bar for  $\text{CH}_4$  and  $1 \times 10^{-5}$  bar for  $\text{H}_2$ .

| Scenario | Initial<br>pCO <sub>2</sub><br>(bar) <sup>1</sup> | pH  | Scenario | pCO <sub>2</sub><br>(bar) | pH <sup>2</sup> | Scenario | pCO <sub>2</sub><br>(bar) | pH  |
|----------|---------------------------------------------------|-----|----------|---------------------------|-----------------|----------|---------------------------|-----|
| A        | 0.1                                               | 7.0 | B        | 0.3                       | 7.9             | C        | 0.1                       | 7.9 |
|          | 1                                                 |     |          |                           | 6.9             |          | 1                         | 6.9 |
|          | 3                                                 |     |          |                           | 6.4             |          | 3                         | 6.4 |
|          | 5                                                 |     |          |                           | 6.2             |          | 5                         | 6.2 |
|          | 8                                                 |     |          |                           | 5.9             |          | 8                         | 5.9 |
|          | 10                                                |     |          |                           | 5.8             |          | 10                        | 5.8 |
|          | 20                                                |     |          |                           | 5.5             |          | 20                        | 5.5 |

<sup>1</sup> This value corresponds to initial pressure considering a headspace of >99%  $\text{CO}_2$  that will equilibrate with a solution at the conditions previously described.

<sup>2</sup> pH value calculated under the assumption that enough buffer was provided at the initial conditions in order that at the equilibrium point, 100 mM  $\text{HCO}_3^-$  are still available in the system.

**Table S4.**  $\Delta G_{Pr-Ox}$  calculated for different pCO<sub>2</sub> used in Scenario A to evaluate the effect of increased pCO<sub>2</sub> in the thermodynamic feasibility of syntrophic conversion of propionate and butyrate

|                       | pCO <sub>2</sub><br>(bar) <sup>1</sup> | log pCO <sub>2</sub> | $\Delta G_{Pr-Ox}$<br>(kJ mol <sup>-1</sup> ) |
|-----------------------|----------------------------------------|----------------------|-----------------------------------------------|
|                       | 0.10                                   | -1.00                | -31.0                                         |
| Experimental<br>range | 0.30                                   | -0.52                | -28.2                                         |
|                       | 1.00                                   | 0.00                 | -25.1                                         |
|                       | 3.00                                   | 0.48                 | -22.3                                         |
|                       | 5.00                                   | 0.70                 | -21.0                                         |
|                       | 8.00                                   | 0.90                 | -19.8                                         |
|                       | 10.00                                  | 1.00                 | -19.2                                         |
|                       | 20.00                                  | 1.30                 | -17.4                                         |

<sup>1</sup> This value corresponds to initial pressure considering a headspace of >99% CO<sub>2</sub> that will equilibrate with the solution at the conditions previously described.



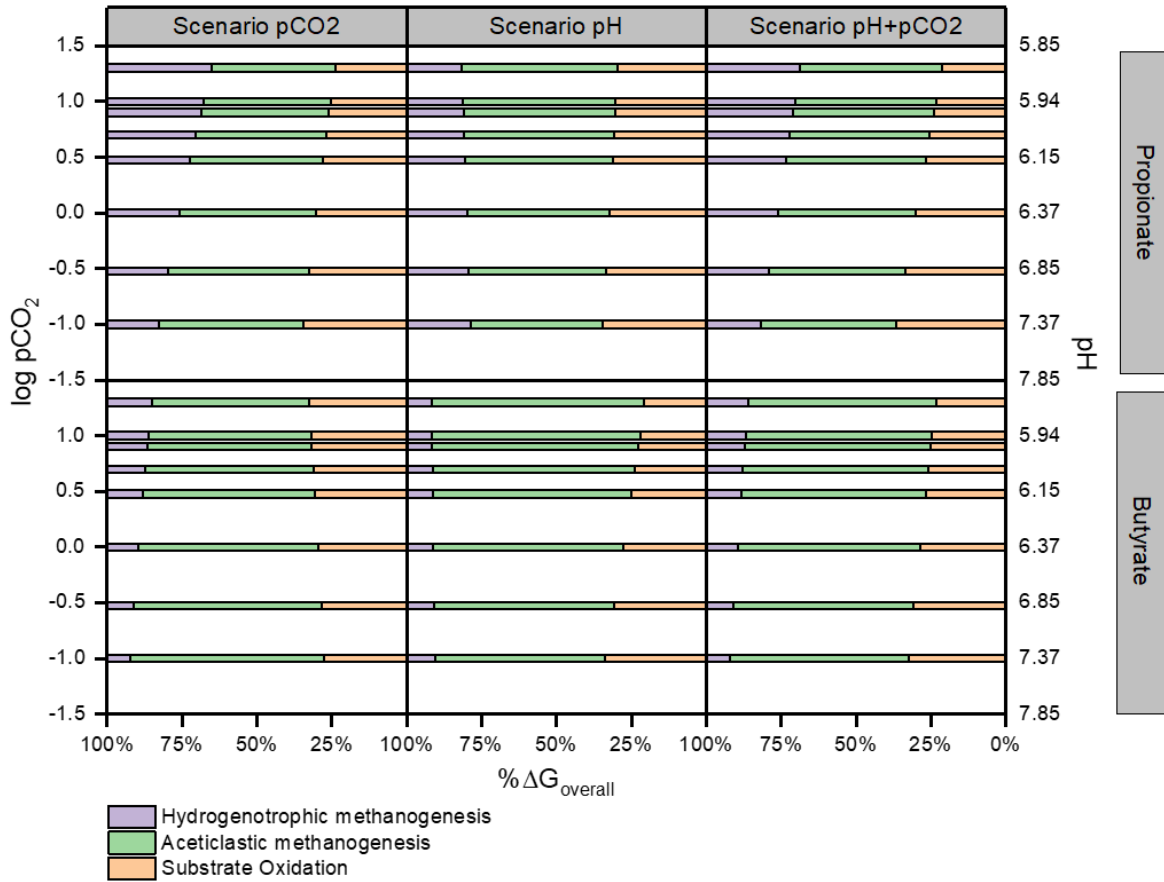

**Figure S3.** Theoretical share of  $\Delta G_{\text{Overall}}$  for each of the proposed scenarios for the syntrophic conversion of propionate and butyrate. Scenario A – partial pressure of CO<sub>2</sub> (pCO<sub>2</sub>) in propionate and butyrate conversion. Scenario B – pH. Scenario C – concomitant effect of pH and pCO<sub>2</sub>. All the scenarios were calculated at T=35°C and p<sub>H<sub>2</sub></sub>= 1x10<sup>-5</sup> bar. The colored segment of the bar represents the potential biochemical energy share for: hydrogenotrophic methanogenesis ( $\Delta G_{\text{HyM}}$ ) in purple, propionate ( $\Delta G_{\text{Pr-Ox}}$ ) or butyrate ( $\Delta G_{\text{Bu-Ox}}$ ) oxidation in orange, aceticlastic methanogenesis ( $\Delta G_{\text{AcM}}$ ) in green.

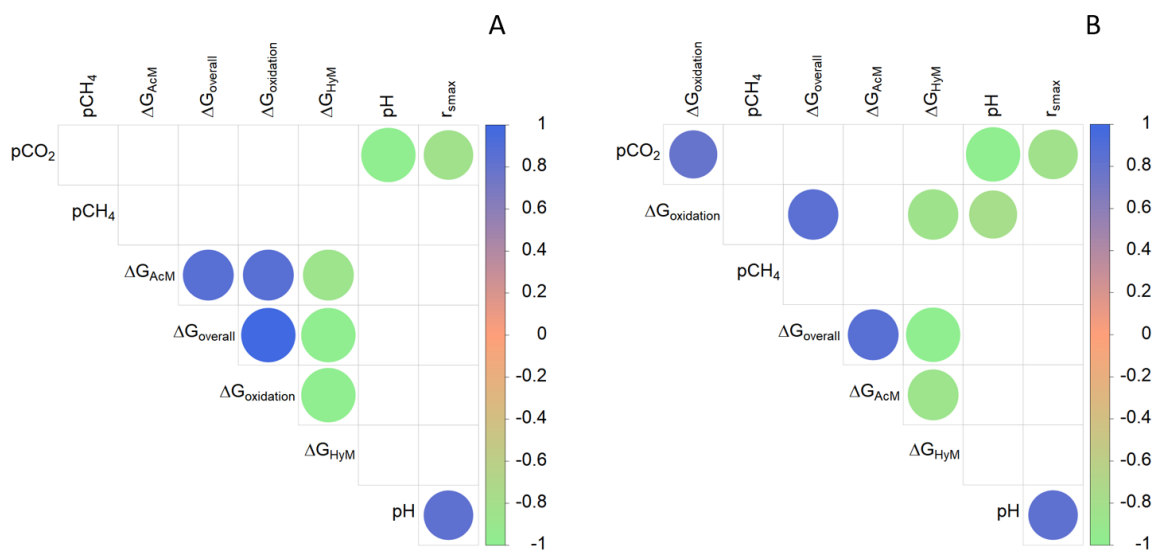

**Figure S4.** Correlogram for the measured and calculated data from the experiments of syntrophic propionate A) and butyrate B) conversion under conditions of elevated pCO<sub>2</sub> considering two different pH<sub>2</sub> values: 1x10<sup>-5</sup> bar and 6x10<sup>-4</sup> bar. The correlation was calculated using the Spearman correlation coefficient (r<sub>s</sub>) and ordered through hierarchical clustering. Circles with increased diameter represent a stronger correlation. According to the scale included to the right of the figure, values closer to 1 (in blue) represent a significant positive correlation, whereas values closer to -1 (in green) represent a significant negative correlation. Abbreviations correspond to the overall Gibbs free energy ( $\Delta G_{Overall}$ ), the Gibbs free energy of the sub-reactions (substrate oxidation:  $\Delta G_{Oxidation}$ , acetoclastic methanogenesis:  $\Delta G_{AcM}$ , hydrogenotrophic methanogenesis:  $\Delta G_{HyM}$ ) and to the maximal substrate utilization rate (r<sub>smax</sub>).

**Table S5.** Calculation of the dissolved CO<sub>2</sub>, undissociated acid concentrations corresponding to the experimental conditions of this study

| Initial pressure (bar)                               |                                | 0.3                                                | 1          | 3                    | 5                                                             | 8   |
|------------------------------------------------------|--------------------------------|----------------------------------------------------|------------|----------------------|---------------------------------------------------------------|-----|
| Eq. pCO <sub>2</sub> in the experiments (bar)        |                                | 0.3                                                | 1          | 1.3                  | 2                                                             | 3.5 |
| CO <sub>2(aq)</sub> (g L <sup>-1</sup> )             |                                | 0.3                                                | 1.1        | 3.8                  | 5.4                                                           | 8.6 |
| HCO <sub>3</sub> <sup>-</sup> (meq L <sup>-1</sup> ) |                                | 100                                                | 100        | 100                  | 100                                                           | 100 |
| Eq. pH                                               |                                | 7.4                                                | 6.9        | 6.8                  | 6.6                                                           | 6.3 |
| Compound                                             | Exp. Initial Concentration (M) | Exp. Initial Concentration (gCOD L <sup>-1</sup> ) | pKa (35°C) | Undissociated specie | Concentration range in the experiments (mg L <sup>-1</sup> )* |     |
| Propionate                                           | 0.01                           | 1.1                                                | 4.89       | HPr                  | 2.3 - 27.3                                                    |     |
| Butyrate                                             | 0.01                           | 1.2                                                | 4.81       | HBu                  | 1.6 - 18.9                                                    |     |
| Acetate**                                            | 0.02                           | 1.0                                                | 4.76       | HAc                  | 26.9 - 45.1                                                   |     |

\*Undissociated acids calculated using carbonate equilibrium constant  $k_1$  corrected by temperature (35°C) =  $5.54 \times 10^{-7}$ , Henry's equilibrium constant  $k_H$  corrected by temperature (35°C) =  $0.0245 \text{ mol L}^{-1} \text{ bar}^{-1}$

\*\* Included as additional reference value
